# The value of time in the invigoration of human movements when interacting with a robotic exoskeleton

Dorian Verdel,<sup>1,2\*</sup> Olivier Bruneau,<sup>3</sup> Guillaume Sahn,<sup>1,2</sup> Nicolas Vignais,<sup>1,2</sup> Bastien Berret<sup>1,2,4</sup>

<sup>1</sup>Université Paris-Saclay, CIAMS, 91405, Orsay, France.

<sup>2</sup>CIAMS, Université d'Orléans, Orléans, France

<sup>3</sup>LURPA, Mechanical Engineering Department, ENS Paris-Saclay, Université Paris-Saclay, 91190 Gif-sur-Yvette, France

<sup>4</sup>Institut Universitaire de France, Paris, France

\*To whom correspondence should be addressed; E-mail: [dorian.verdel@ens-paris-saclay.fr](mailto:dorian.verdel@ens-paris-saclay.fr)

1 **Time and effort are critical factors that are thought to be subjectively balanced during the**  
2 **planning of goal-directed actions, thereby setting the vigor of volitional movements. Theo-**  
3 **retical models predicted that the value of time should then amount to relatively high levels**  
4 **of effort. However, the time-effort tradeoff has so far only been studied for a narrow range**  
5 **of efforts. Therefore, the extent to which humans can invest in a time-saving effort remains**  
6 **largely unknown. To address this issue, we used a robotic exoskeleton which significantly**  
7 **varied the energetic cost associated with a certain vigor during reaching movements. In**  
8 **this situation, minimizing the time-effort tradeoff would lead to high and low human ef-**  
9 **forts for upward and downward movements respectively. Consistent with this prediction,**  
10 **results showed that all participants expended substantial amounts of energy to pull on the**  
11 **exoskeleton during upward movements and remained essentially inactive by harnessing**  
12 **the work of gravity to push on the exoskeleton during downward movements, while saving**  
13 **time in both cases. These findings show that a common tradeoff between time and effort**  
14 **can determine the vigor of reaching movements for a wide range of efforts, with time cost**  
15 **playing a pivotal role.**

16 **Keywords:** Cost of time, Time-effort tradeoff, Vigor, Effort, Energy, Exoskeleton, Reaching

## 17 **1 Introduction**

18 Most actions in daily life require us to select the speed or duration of goal-directed movements, that is, their  
19 *vigor* [1]. Thus, it is an ubiquitous feature of volitional actions, the setting of which is thought to be rooted in  
20 the basal ganglia [2, 3], in particular the striatum [4–10]. Current works suggest that vigor essentially reflects  
21 the internal value, or utility, of a given action [1, 11–13]. Numerous behavioral studies have shown that vigor  
22 is indeed modulated by the expected reward of the task at hand [14–19], with reward tending to be discounted  
23 over time [20–22]. However, if the modulation of vigor allows to modify the time needed to accomplish a task,  
24 it also affects the energy expenditure. Interestingly, reward has also been found to increase the propensity to  
25 put extra effort into a task [11, 23]. Therefore, movement vigor may generally result from the maximization of a  
26 capture rate, such as the sum of all rewards achieved minus all efforts expended, divided by the time. This global

27 tendency has been observed in humans and many other species in foraging-like tasks [24–27]. An alternative  
28 formulation considers vigor as the outcome of the minimization of a subjective weighting between a cost of time  
29 (CoT) and a cost of movement, modulated by the expected reward [20, 21], which is convenient to model vigor  
30 in reaching tasks [28, 29]. When reward is not explicit (e.g., pointing to a light spot), movement vigor could  
31 then be determined by a common tradeoff between time and effort, which could represent a trait-like feature of  
32 individuality [30–34]. Empirical evidence of such a subjective CoT was recently reported in an isometric reaching  
33 task without explicit reward [35]. Based on this premise, several computational models were developed to account  
34 for the vigor of individuals during walking [34] and reaching [20, 29, 31, 35, 36], from a similar minimum time-effort  
35 (MTE) principle. Estimation of the underlying CoT in reaching was obtained from point-to-point movements of  
36 various amplitudes, using effort costs traditionally represented in motor control [29, 31], even though other factors  
37 such as accuracy or comfort may also modulate vigor in general [37–41].

38 Interestingly, computational models revealed that the putative CoT should actually grow quickly to account  
39 for the vigor of self-paced pointing movements, such that time could amount to relatively high levels of effort. In  
40 other words, people could be prone to expend substantial energy to avoid excessively long movement times. Pre-  
41 vious paradigms did not allow to test this prediction because the energetic cost of actions was too small or varied  
42 marginally through the different conditions of the task [11, 20, 27, 31, 35, 36]. Furthermore, while moving faster  
43 requires more energy expenditure, it does not necessarily have to come from human muscles, as demonstrated  
44 by using an electric bike or cycling downhill for instance. Therefore, do people rely on a common time-effort  
45 tradeoff to set movement vigor when the effort term is broadly varied experimentally?

46 Here, we designed an original experiment leveraging the versatility of a robotic exoskeleton to investigate this  
47 question. Two conditions requiring either a high or low energy expenditure to move with a similar vigor were  
48 implemented. The task consisted of performing vertical forearm movements to point-light targets while wear-  
49 ing the exoskeleton (Fig. 1A). During upward movements, the exoskeleton provided an assistance of duration  
50  $T_j$  along a predefined human-like trajectory so that the participant could comfortably and accurately complete  
51 the task without any effort. Crucially, this duration could be significantly longer than the participant’s preferred  
52 movement duration in the task,  $T_{h,0}$ . In this case, the MTE theory predicts that all participants should be prone  
53 to energize the movement by pulling on the exoskeleton (Fig. 1B). To induce high levels of effort, and strongly  
54 penalize potential time savings, the robot applied a viscous-like resistance proportional to the participants’ max-  
55 imum voluntary force as soon as they outpaced it. During downward movements, we took advantage of gravity  
56 to design a different assistance whereby saving a similar amount of time as for upward movements would instead  
57 require virtually no effort. In this case, the MTE theory predicts that all participants should remain practically  
58 inactive to behave optimally (Fig. 1C). This apparatus allowed for a significant departure from the MTE predic-  
59 tions depending on the participants’ choices. For instance, participants could choose to remain inactive in all  
60 conditions, thus failing to save time when relevant in the sense of the MTE theory. In contrast, participants could  
61 actively put energy into the task in all conditions, thus failing to save effort when relevant in the sense of the  
62 MTE theory. Thus, the results will determine whether vigor is the result of a common time-effort tradeoff dur-  
63 ing reaching movements whose energy cost for a certain duration varies greatly, or whether the MTE principle  
64 should be revised.

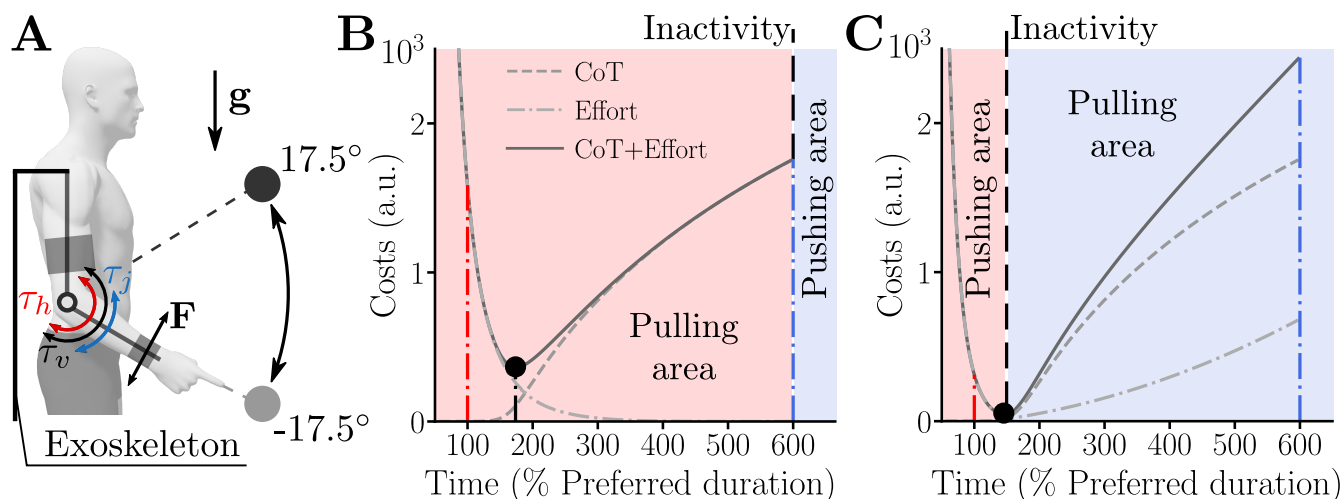

Figure 1: Illustration of theoretical predictions for an assistance 6x slower than the nominal vigor of the participant in the task (*i.e.*,  $T_j = 600\%T_{h,0}$ ). **A**. Different input torques involved in the task. The term  $\tau_j$  is the torque provided by the robot as a biological movement assistance (here minimum jerk trajectory of duration  $T_j$ ) as long as the participant does not outpace the planned trajectory. The term  $\tau_h$  is the net torque produced by the human muscles ( $\tau_h = 0$  when the participant is inactive). The term "pulling" (respectively "pushing") refers to a participant generating an upward/positive (respectively downward/negative) torque  $\tau_h$ . The term  $\tau_v$  is a viscous-like torque applied by the robot, which is replacing  $\tau_j$  as soon as the participant choose to outpace the planned trajectory.  $F$  is the measured interaction force. **B**. Possible strategies during upward movements in terms of effort and time costs (see Equation 8 for details regarding the cost function). The red vertical line highlights the costs associated with the participant's preferred duration  $T_{h,0}$ . The blue vertical line highlights the costs associated with the exoskeleton's planned duration. The black disk represents the optimal strategy in the sense of a MTE tradeoff. During upward movements, the participant could only save time by actively pulling on the exoskeleton (*i.e.*,  $\tau_h > 0$ ), which is represented by the shaded red area. The participant could also remain inactive and be moved by the robot, which is represented by the vertical dashed black line (inactivity). Otherwise, the participant could actively push against the exoskeleton (*i.e.*,  $\tau_h < 0$ ), although it would mean voluntarily wasting both time and effort. **C**. Possible strategies during downward movements in terms of effort and time costs. The pulling (shaded blue) and pushing (shaded red) areas are different from panel **B** because both pushing and pulling can allow to save time in this condition (although the latter strategy would be non-optimal from the MTE perspective). The critical difference for downward movements is that participants could save time by simply dropping their forearm, thereby passively pushing on the exoskeleton thanks to their own weight (dashed black line labelled inactivity). A strong deviation from this nearly optimal strategy could be observed if participants use a fixed effort-based heuristic to save time, by either actively pulling (to compensate for a part of the weight) or actively pushing on the exoskeleton.

## 65 2 Results

66 In this experiment, we asked  $N = 12$  participants to perform reaching movements to point-light targets at their  
 67 preferred pace. The movements consisted of a discrete sequence of vertical elbow flexions and extensions. Both  
 68 the target and a visual feedback of the participant's current position were displayed on a large screen in front of  
 69 the participant. Our experiment was divided in two sessions. In the first session (*baseline*), the exoskeleton was  
 70 controlled in transparent mode, that is, no assistance was provided by the robot that compensated for its own  
 71 dynamics and minimized interaction efforts [42, 43]. In this session, before being installed in the exoskeleton, the  
 72 participants also performed a maximum isometric voluntary force (MVF) test, performed using an 1-axis force  
 73 transducer (the reader is deferred to the Methods section for details regarding the procedure). The main objectives  
 74 of the baseline session were to estimate the nominal vigor of the participants (*i.e.*, their preferred movement  
 75 duration in the task) and their maximal force characteristics. This allowed to design a subject-specific assistance,

76 which was normalized with respect to time and effort for the subsequent test session. Knowing the nominal vigor  
77 of the participants in the task further allowed us to infer the CoT for the optimal control simulations [29, 35]. In  
78 the second session (*test*), we asked the same participants to perform similar movements but with a personalized  
79 assistance provided by the robot. To this aim, we programmed the exoskeleton to follow minimum jerk trajectories  
80 of different durations, ranging from the participant's preferred vigor ( $T_j = 100\%T_{h,0}$ ) to a 6x slower vigor ( $T_j =$   
81  $600\%T_{h,0}$ ). Participants could decide to outpace the planned trajectory at any time during the movement. For  
82 upward movements, this required an active effort from the participant but, for downward movements, the planned  
83 trajectory could be outpaced by simply remaining inactive due to the effects of gravity. For both movement  
84 directions, when the planned trajectory was outpaced, the robot applied a viscous-like resistance proportional to  
85 the participant's MVF (see Equation 3). The reader is deferred to the Materials and Methods section for more  
86 details about all the procedures.

## 87 2.1 Baseline session

88 In the baseline session, participants performed self-paced vertical pointing movements of four different ampli-  
89 tudes without active assistance/resistance from the robot. Qualitatively, the velocity profiles were overall bell-  
90 shaped as it is commonly observed for unrestrained point-to-point movements of this type (see Figures 2A,B,D,E).  
91 The only exception was for the largest movement amplitude which tended to exhibit a correction near the end of  
92 the movement (see Figures 2B,E). Importantly for our purpose, we observed the classical affine amplitude-duration  
93 relationship that characterizes the vigor of self-paced reaching movements [31, 33, 44, 45]. This relationship was  
94 observed at both individual and population levels, for upward and downward movements separately (see Figures  
95 2C,F). These findings are consistent with results from previous studies with the same exoskeleton [42, 46].

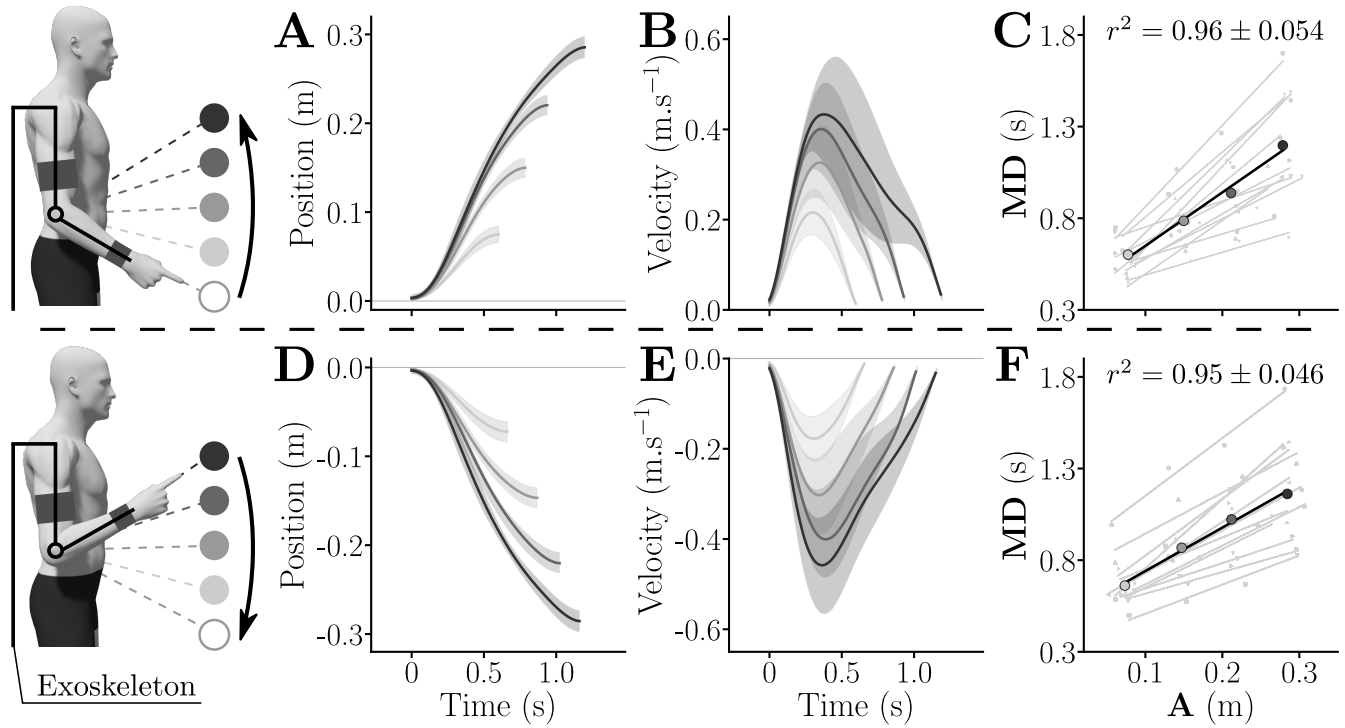

Figure 2: General kinematics averaged across all participants in the transparent exoskeleton for both upward and downward movements. **A,D.** Averaged positions for upward (**A**) and downward (**D**) movements across population. Standard deviations are depicted as shaded areas. **B,E.** Averaged velocities for upward (**B**) and downward (**E**) movements across population. Standard deviations are depicted as shaded areas. **C,F.** Amplitude-movement duration linear regressions for each participant (grey) for upward (**C**) and downward movements (**F**). The averaged behavior of the population is given in black. The average and standard deviation of the correlation coefficient across the population are given on their respective graphs.

96 The average affine fits across participants for upward and downward movements (black lines in Fig. 2C,F),  
 97 which were used to compute the vigor scores with respect to the population average for each participant and  
 98 each direction (see Equation 4), were as follows:

$$\begin{cases} T(A) = 2.8A + 0.37 & \text{for upward movements} \\ T(A) = 2.29A + 0.52 & \text{for downward movements.} \end{cases} \quad (1)$$

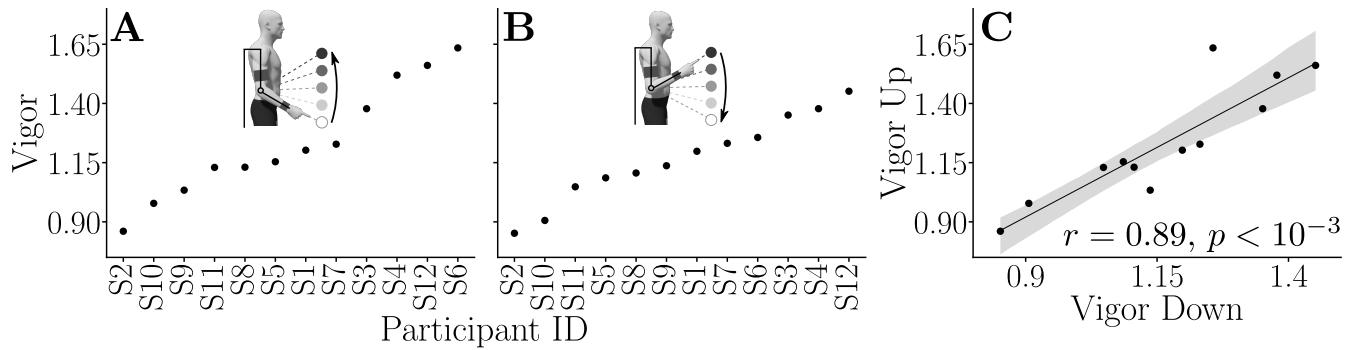

Figure 3: Individual vigor scores and consistency between upward and downward directions. **A.** Individual vigor scores for upward movements, sorted from lowest to highest. **B.** Individual vigor scores for downward movements, sorted from lowest to highest. **C.** Correlation analysis showing the consistency of vigor scores with regard to movement direction (Pearson correlation test).

99 The spreading of individual vigor scores was shown to follow the same trend as in previous studies [32, 33],  
 100 which was verified both for upward and downward movements (see Figures 3A,B). Moreover, the vigor scores of  
 101 participants exhibited a strong consistency across directions ( $r = 0.89$ ,  $p < 10^{-3}$ , Fig. 3C). This analysis justifies *a*  
 102 *posteriori* the use of the average amplitude-duration relationship of each participant to design the subject-specific  
 103 assistive control law of the test session.

## 104 2.2 Test session

105 In the test session, two amplitudes ( $17.5^\circ$ , small amplitude (SA);  $35^\circ$ , large amplitude (LA)) and four assistance du-  
 106 rations ( $T_j = 100\%T_{h,0}$ ,  $200\%T_{h,0}$ ,  $400\%T_{h,0}$  and  $600\%T_{h,0}$ ) were considered. The assistance was self-triggered  
 107 by pressing a button with the left hand such that the participant could easily synchronize with the exoskeleton  
 108 at the beginning of each movement. The assistance followed a minimum jerk velocity profile (see Equation 2 and  
 109 [47, 48]). For upward movements, the planned trajectory was accurately followed if the participants remained  
 110 inactive. For downward movements, the planned trajectory was followed only if the participants accompanied  
 111 the robot's movement by carrying their weight. Importantly, the participants could actively pull ( $\tau_h > 0$ ) or  
 112 actively push ( $\tau_h < 0$ ) on the exoskeleton at any time during the movement. When they outpaced the planned  
 113 trajectory, the exoskeleton applied a resistance proportional to the difference between the minimum jerk velocity  
 114 and the actual velocity (see Equation 3). This resistance was calibrated on the basis of the MVF of the participant.  
 115 It is worth noting that no resistance was applied to the participant if the actual velocity profile corresponded to  
 116 the minimum jerk profile. Moreover, independently of the participant's behavior, the exoskeleton was position-  
 117 programmed near the target to remove any possible confound between minimizing time or preserving accuracy  
 118 [37, 41, 49]. The experimental data were eventually compared to optimal control simulations according to the MTE  
 119 theory, with the cost of time identified in the baseline session. We also compared these results to fixed-time sim-  
 120 ulations performed with the preferred duration of the average participant ( $T_{h,0}$ ) and with the assistance planned  
 121 duration ( $T_j$ ), which can be seen as two extreme non-MTE strategies. The reader is deferred to the Materials and  
 122 Methods for details.

123 Qualitatively, the experimental results indicated that the participants systematically saved time compared to  
 124 the planned duration of the assistance (see velocity profiles in Figure 4 for LA and supplementary Figure S.1 for  
 125 SA). Overall, these velocity profiles exhibited one main acceleration and one main deceleration even though they  
 126 were less smooth than minimum jerk velocity profiles due to interaction with the robot. Peak velocities were  
 127 larger than those of the assistance and movement durations were shorter. Noticeably, the MTE simulations were  
 128 generally better at predicting the observed velocity profiles than simulations performed in fixed duration  $T_j$  or  
 129  $T_{h,0}$ .

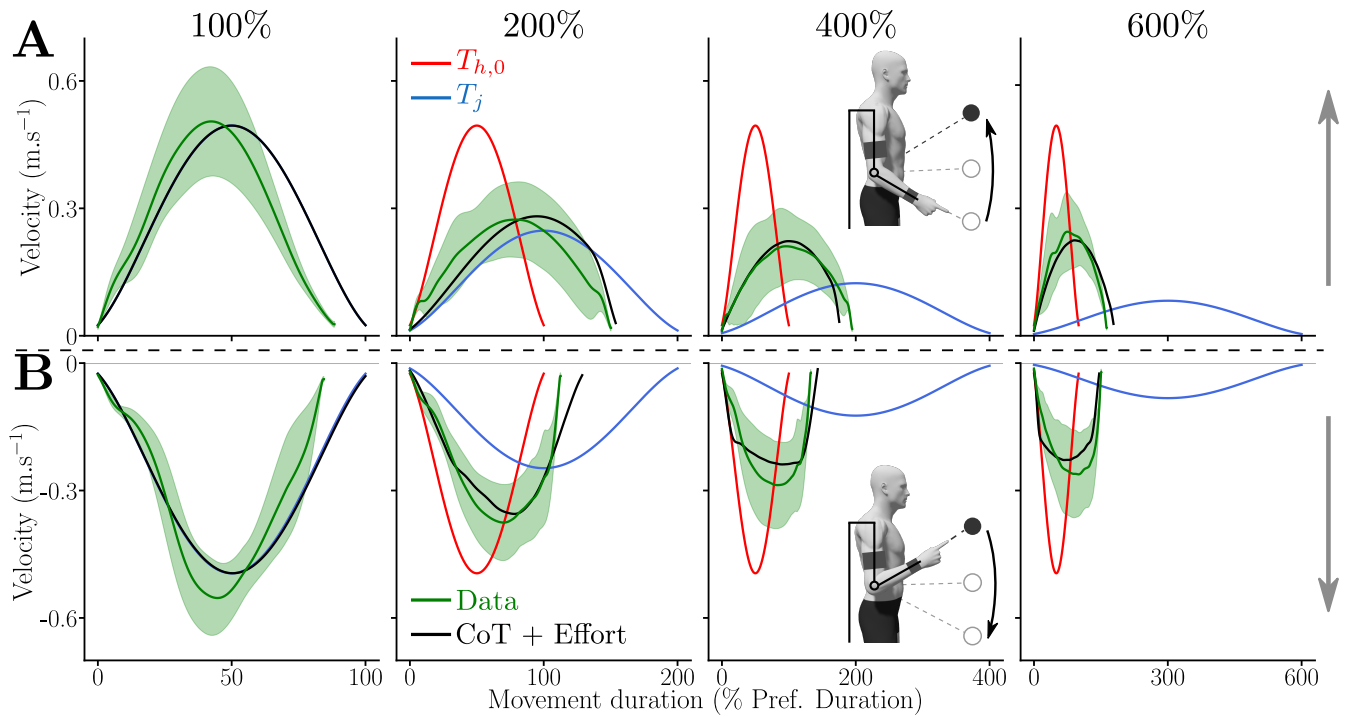

Figure 4: Average velocity profiles measured for the large amplitude (LA) and for each assistance duration. In green the average recorded velocity profiles and their standard deviation as a green shaded area, in black the optimal time-effort compromise, in blue the minimum jerk planned by the assistance and in red the constant time strategy. **A.** Upward movements. **B.** Downward movements.

130 Quantitatively, the participants' behavior was described by three main parameters in this task: 1) the move-  
 131 ment duration relative to the preferred movement duration (MD), 2) the maximum interaction force between  
 132 the participant and the exoskeleton in percentage of the MVF from the agonist muscle group (*i.e.*, flexors when  
 133 moving upwards and extensors when moving downwards) and 3) the work of the interaction force. The first two  
 134 of these parameters are normalized by individual data in agreement with the design of the experiment. The work  
 135 is used as an absolute estimation of the additional energy expended by the participant to modulate the execution  
 136 of the task (and possibly save time).

137 **Movement duration** The MD measured during the experiment for the different assistance conditions, direc-  
 138 tions and amplitudes is depicted in Figures 5A,B,D,E.

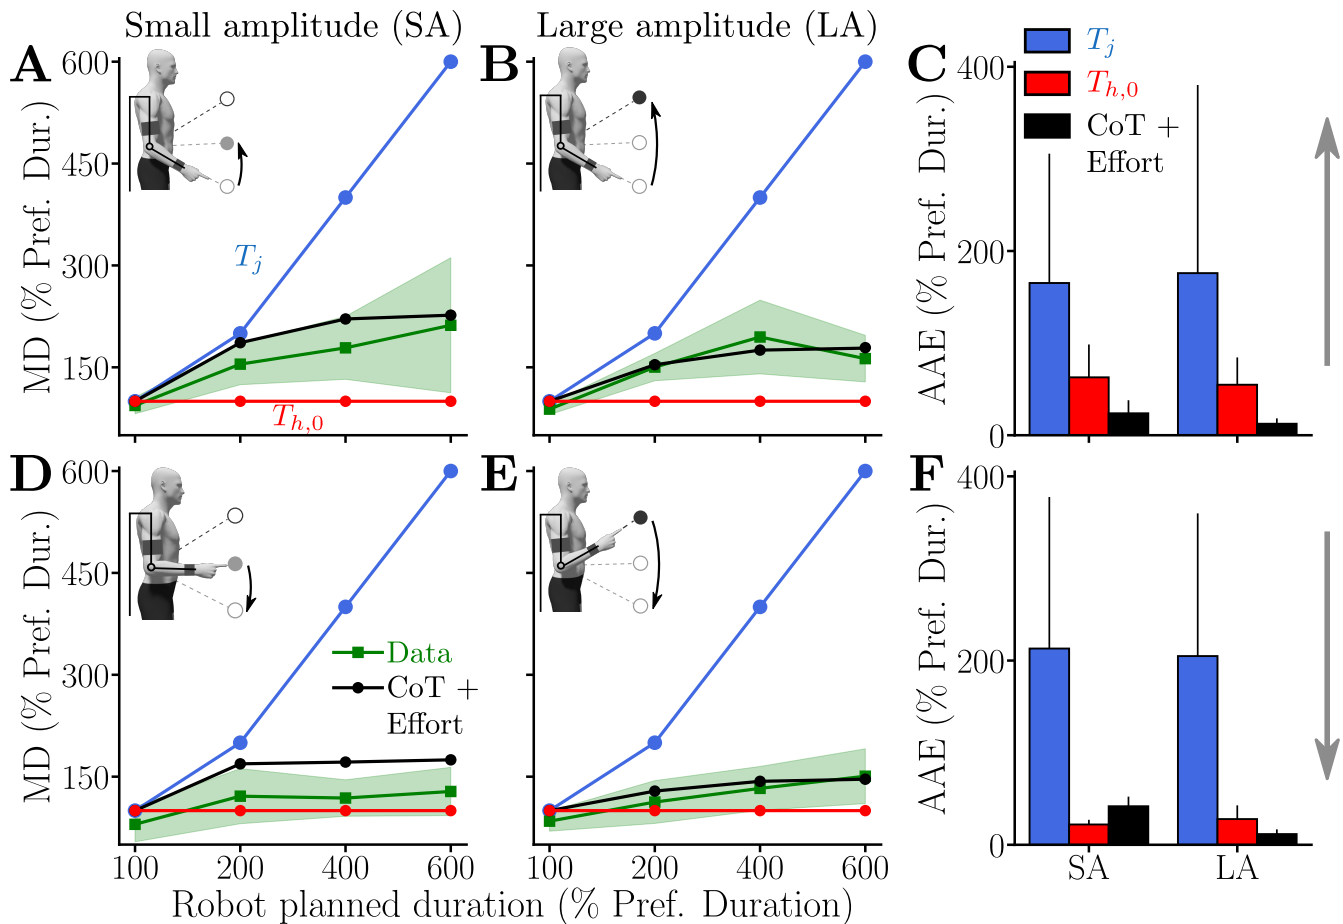

Figure 5: Chosen relative movement duration (MD) of participants when assisted by the exoskeleton with different  $T_j$ . Average data are represented by green lines with standard deviation represented by green shaded areas. Outputs of different simulated motor strategies are depicted as follows: 1) in blue: simulation results with MD=  $T_j$ , 2) in red: simulation results with MD=  $T_{h,0}$  and 3) in black: simulation results under a MTE hypothesis. **A,B.** Relative movement duration of upward movements for the small amplitude (SA, **A.**) and the large amplitude (LA, **B.**). **C.** Averaged absolute errors (AAE) of the different modeled strategies for both SA and LA for upward movements. **D,E.** Relative movement duration of downward movements for the small amplitude (SA, **D.**) and the large amplitude (LA, **E.**). **F.** Averaged absolute errors (AAE) of the different modeled strategies for both SA and LA for downward movements.

139 The results show that participants moved much faster than  $T_j$  in the 200%, 400% and 600% conditions. This  
 140 behavior was visible during movements of both SA and LA without any noticeable difference, and independently  
 141 of movement direction (upward or downward). Nevertheless, participants did not return to their nominal MD  
 142 in the task ( $T_{h,0}$ , measured during the baseline session). Indeed, MD tended to increase as  $T_j$  increased for both  
 143 amplitudes and both directions. The increase in MD tended to be higher for upward than for downward move-  
 144 ments. In the 100% condition, participants were on average slightly faster than during the baseline experiment,  
 145 thereby suggesting that they were not completely passive and spent some effort to save even a little time.

146 These qualitative trends were confirmed by statistical Friedman tests. In particular, a main effect of the condi-  
 147 tion ( $W = 0.72$ ,  $Q_3 = 25.9$ ,  $p < 10^{-4}$ ) and a main effect of the direction ( $W = 0.69$ ,  $Q_1 = 8.33$ ,  $p = 0.0039$ ) were  
 148 observed. These tests also confirmed that movement amplitude has no effect on the normalized MD ( $W = 0.11$ ,  
 149  $Q_1 = 1.33$  and  $p = 0.25$ ).

150 Wilcoxon-Nemenyi pairwise comparisons were used as post-hoc tests to assess the most salient differences  
 151 between conditions. First, upward movements of SA were significantly slower in the 200%, 400% and 600%



152 conditions than in the 100% condition (in all cases:  $p \leq 9.7 \times 10^{-5}$ ,  $D \geq 1.66$  where  $D$  was Cohen's  $D$ ). The  
153 same trend was observed for downward movements of SA with movements performed in 200%, 400% and 600%  
154 conditions being significantly slower than in the 100% condition (in all cases:  $p \leq 0.012$ ,  $D \geq 1.22$ ). Second,  
155 upward movements of LA were significantly slower in the 200%, 400% and 600% conditions than in the 100%  
156 condition (in all cases:  $p \leq 3.7 \times 10^{-5}$ ,  $D \geq 1.83$ ). Upward movements of LA were also significantly slower  
157 in the 400% condition than in the 200% condition ( $p = 0.01$ ,  $D = 1.08$ ). Finally, downward movements of  
158 LA were shown to be significantly slower in the 200%, 400% and 600% conditions than in the 100% condition  
159 (in all cases:  $p \leq 0.02$ ,  $D \geq 1.14$ ) and those performed in the 600% condition were significantly slower than  
160 those performed in the 200% condition ( $p = 0.03$ ,  $D = 1.05$ ). In sum, these comparisons across conditions  
161 show that MD tended to increase as  $T_j$  increased, independently of the direction and amplitude. Furthermore,  
162 comparisons were performed to analyze differences between upward and downward movements. Results were  
163 that MD was significantly lower for downward movements than for upward movements in LA in the 200%  
164 condition ( $p = 0.002$ ,  $D = 1.43$ ), in both SA and LA in the 400% condition (for both amplitudes:  $p \leq 0.002$ ,  
165  $D \geq 1.38$ ) and only in SA for the 600% condition ( $p = 0.004$ ,  $D = 1.12$ ). In sum, upward movements were  
166 overall slower than downward movements in our task.

167 Overall, the MTE model replicated well the observed movement durations with the CoT identified during  
168 the baseline session. We evaluated the model predictions in terms of average absolute errors on MD (AAE, see  
169 Figure 5C,F). In agreement with the qualitative velocity profiles, the error of the MTE model was lower than those  
170 obtained when simulating movements with  $MD=T_j$  (i.e., with the planned MD) or with  $MD=T_{h,0}$  (i.e. with the  
171 preferred MD of the average participant). The only notable exception was the AAE observed for downward  
172 movements in SA because the MTE prediction slightly overestimated movement duration in this condition.

173 **Maximum interaction force** To understand the behavior of the participants in terms of effort, the maximum  
174 interaction force between the human and the exoskeleton relative to the MVF of the agonist group was analyzed  
175 (Figs. 6A,B,D,E). A positive value of this parameter means that the participant pulled on the exoskeleton (which  
176 is necessarily done actively) and a negative value means that the participant pushed on the exoskeleton (which  
177 can be done either passively –due to gravity– or actively).

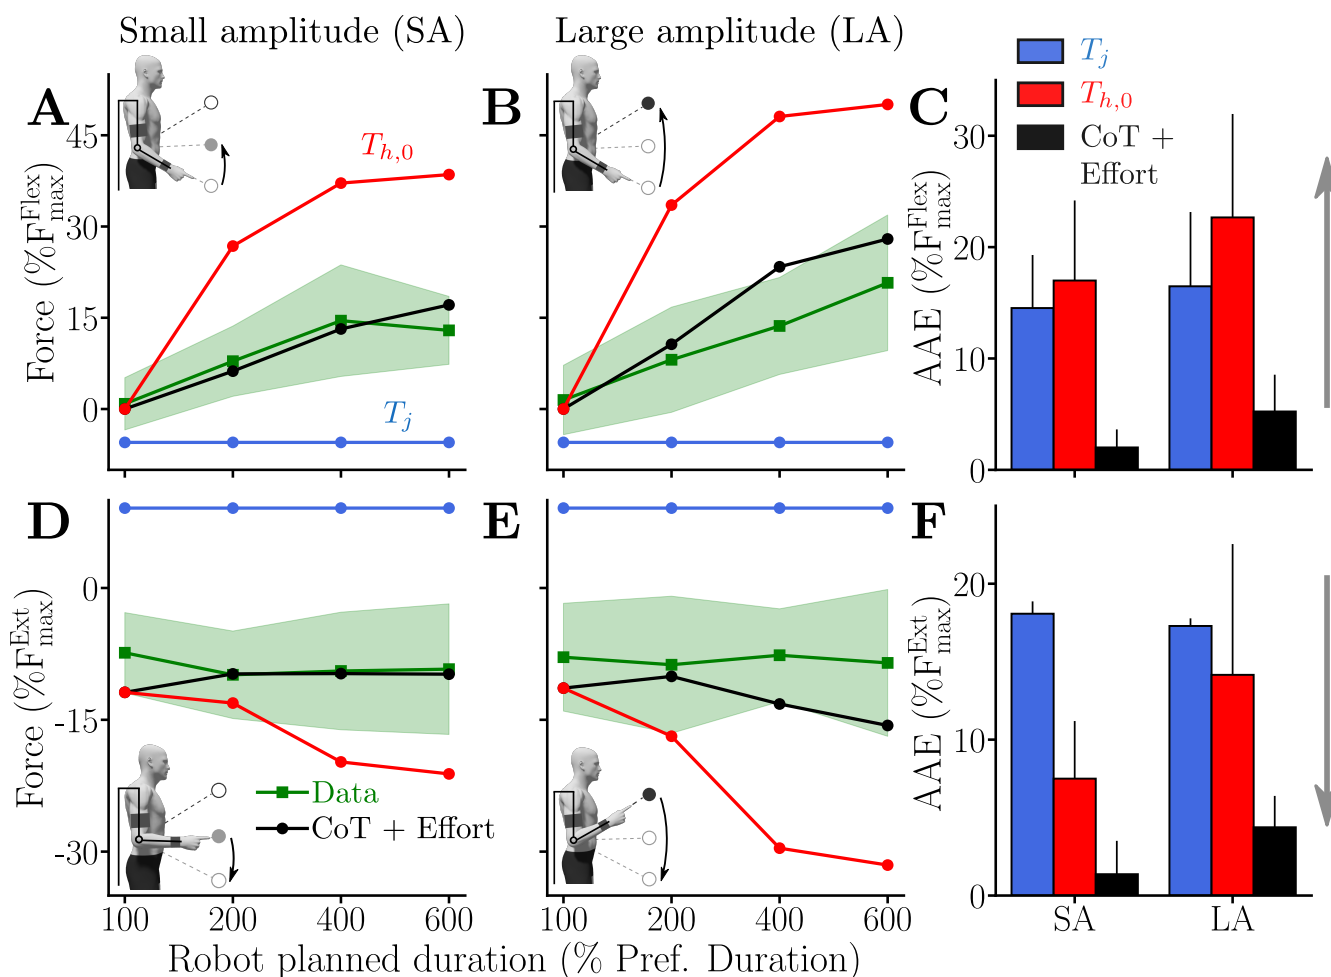

Figure 6: Maximum interaction force when the participant is assisted by the exoskeleton with different  $T_j$ . Average data are represented by green lines and standard deviations as green shaded areas. Outputs of different simulated motor strategies (based on the dynamics from Equations 7 and 9, see Methods) are depicted as follows: 1) in blue: simulation results with MD=  $T_j$ , 2) in red: simulation results with MD=  $T_{h,0}$  and 3) in black: simulation results under a MTE hypothesis. **A,B.** Maximum interaction force during upward movements for the small amplitude (SA, **A.**) and the large amplitude (LA, **B.**). **C.** Average absolute error (AAE) of the different modeled strategies for both SA and LA for upward movements. **D,E.** Maximum interaction force during downward movements for the small amplitude (SA, **D.**) and the large amplitude (LA, **E.**). **F.** Average absolute error (AAE) of the different modeled strategies for both SA and LA for downward movements.

178 The results show that, on average, participants tended to pull more and more on the exoskeleton as  $T_j$  in-  
 179 creased (Figs. 6A,B). Moreover, when moving upward in the 100% condition, the maximum interaction force  
 180 between the participants and the exoskeleton was around zero on average. This means that participants tended  
 181 to synchronize with the exoskeleton rather than being completely passive. Interestingly, their behavior was  
 182 different during downward movements for which the maximum interaction force was globally constant and in-  
 183 dependent of  $T_j$  (Figs. 6D,E). These trends were statistically confirmed by Friedman tests. In particular, a main  
 184 effect of the assistance condition ( $W = 0.79$ ,  $Q_3 = 28.3$ ,  $p < 10^{-5}$ ) and a main effect of the direction ( $W = 1$ ,  
 185  $Q_1 = 12$ ,  $p < 10^{-3}$ ) were observed. Once again, movement amplitude did not seem to have a significant effect on  
 186 the employed motor strategy, showing the robustness of the observations ( $W = 0.03$ ,  $Q_1 = 0.33$  and  $p = 0.56$ ).

187 Wilcoxon-Nemenyi pairwise comparisons on SA upward movements showed that participants applied sig-  
 188 nificantly more force to pull the robot in the 200%, 400% and 600% conditions than in the 100% condition (in

189 all cases:  $p \leq 0.005$ ,  $D \geq 1.37$ ). The participants also applied significantly more force to pull the robot in the  
190 400% condition than in the 200% condition ( $p = 0.022$ ,  $D = 0.87$ ). On the contrary, no significant difference  
191 was found between the forces applied on the exoskeleton during downward movements. The same trends were  
192 observed during LA upward movements for which the participants applied significantly more force to pull the  
193 robot in the 400% and 600% conditions than in the 100% condition (in both cases:  $p \leq 7.3 \times 10^{-4}$ ,  $D \geq 1.75$ ).  
194 The participants also applied significantly more force to pull on the robot in the 600% condition than in the 200%  
195 condition ( $p = 0.0035$ ,  $D = 1.27$ ). As for SA, no significant difference was found between the forces applied on  
196 the exoskeleton during downward movements for LA. In summary, the participants applied an increasing maxi-  
197 mal force on the exoskeleton as  $T_j$  increased for upward movements. For downward movements, they applied a  
198 constant maximal force, independent of  $T_j$ .

199 Furthermore, participants applied significantly different forces (in terms of absolute values) on the exoskeleton  
200 between upward and downward movements for all the conditions and for both SA (in all cases:  $p \leq 2.46 \times 10^{-4}$ ,  
201  $D \geq 1.85$ ) and LA (in all cases:  $p \leq 0.0011$ ,  $D \geq 1.58$ ). Overall, the constant force applied when moving  
202 downwards (*i.e.*,  $-8.59 \pm 0.84 \%F_{\max}^{\text{Ext}}$ ) was remarkably close to the maximal effect of the weight of the human  
203 forearm and hand as estimated from anthropometric tables (*i.e.*,  $-8.62 \%F_{\max}^{\text{Ext}}$ ). In summary, this suggests that  
204 participants were able to take advantage of gravity to save time when moving downwards.

205 Finally, we evaluated the model predictions in terms of maximum interaction force with the same error crite-  
206 rion as for MD (see Figure 6C,F). For this parameter, the MTE theory provided clearly the best results compared to  
207 alternative fixed-time strategies. On the one hand, simulations performed with  $\text{MD}=T_j$  consistently resulted in  
208 a maximal interaction force whose sign was opposite to the measures. On the other hand, simulations performed  
209 with  $\text{MD}=T_{h,0}$  overestimated the interaction force that participants were apparently willing to use during the  
210 experiment. In contrast, the MTE theory correctly predicted the experimental trends across assistance durations,  
211 amplitudes and movement directions.

212 **Work of interaction force** To get an absolute estimation of the total energy input (in Joules) from the par-  
213 ticipants onto the exoskeleton, we analyzed the work of the measured interaction force. A negative value for  
214 this parameter means that the interaction force mainly worked in the direction opposite to the motion. On the  
215 contrary, a positive value would reflect that the measured interaction force worked in the same direction as  
216 the motion. In particular, if a participant remains inactive during downward movements, this parameter should  
217 remain positive and approximately constant across assistance conditions for a given amplitude since the work  
218 of weight only depends on motion amplitude. The work of interaction force during the different experimental  
219 conditions is reported in Figures 7A,B,D,E.

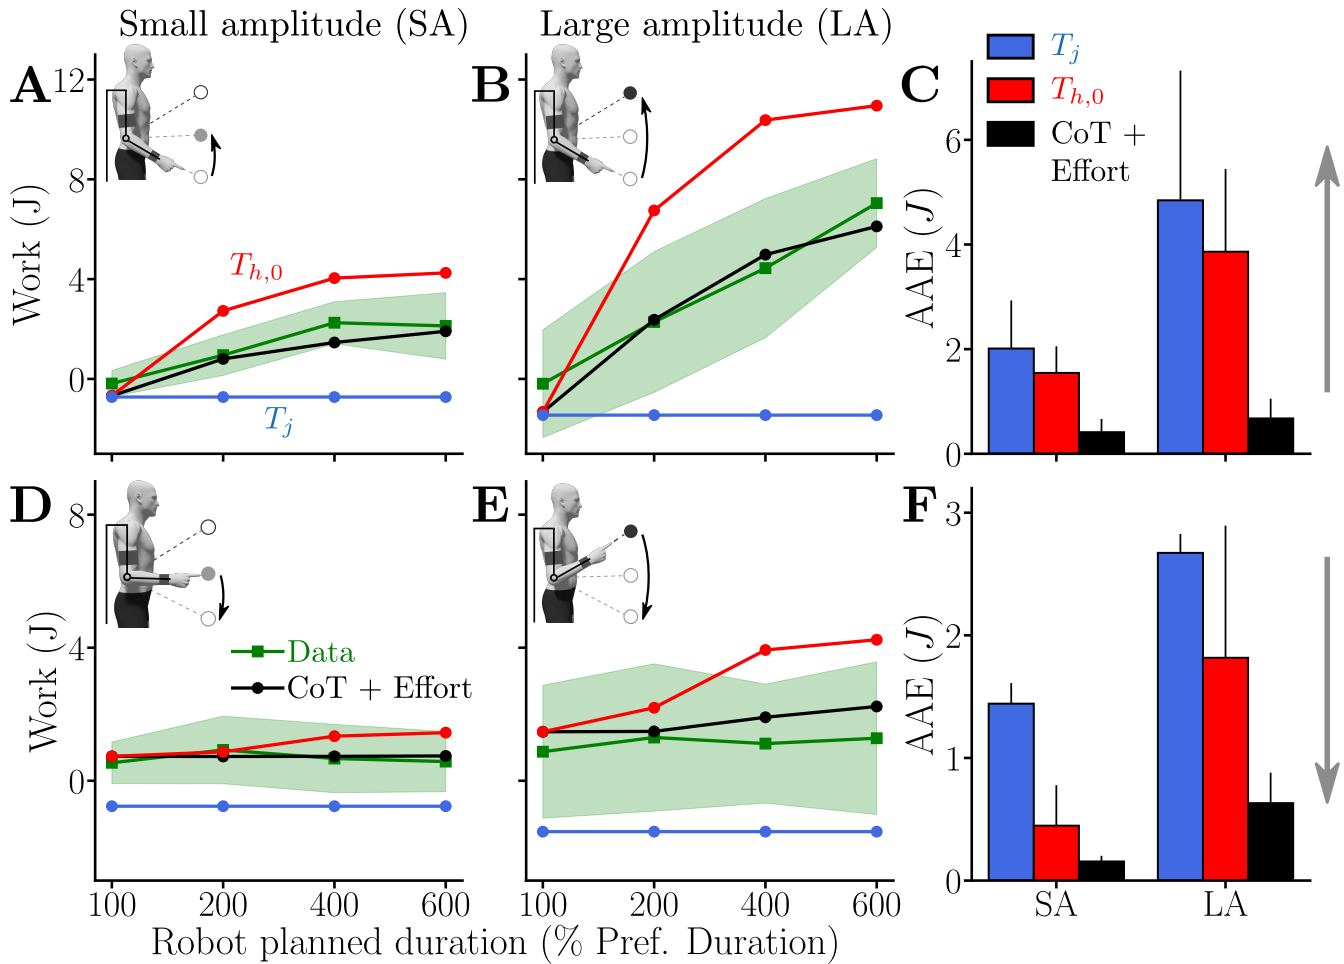

Figure 7: Work of the interaction force when the participant is assisted by the exoskeleton with different  $T_j$ , average data are represented by green lines and standard deviations as green shaded areas. Outputs of different simulated motor strategies are depicted as follows: 1) in blue: simulation results with  $MD = T_j$ , 2) in red: simulation results with  $MD = T_{h,0}$  and 3) in black: simulation results under a MTE hypothesis. **A,B.** Work for upward movements for the small amplitude (SA, **A.**) and the large amplitude (LA, **B.**). **C.** Average absolute error (AAE) of the different modeled strategies for both SA and LA for upward movements. **D,E.** Work for downward movements for the small amplitude (SA, **D.**) and the large amplitude (LA, **E.**). **F.** Average absolute error (AAE) of the different modeled strategies for both SA and LA for downward movements.

220 The average work in Joules turned out to be very similar to what was observed in terms of maximum interaction  
 221 force. For upward movements, there was an increase in the human energy input to displace the robot when  
 222  $T_j$  increased for both movement amplitudes. On the contrary, the work of interaction force was almost constant  
 223 across conditions when moving downward. Overall, the energy input to the robot was higher for LA compared to  
 224 SA movements, which was expected given the previous results on MD, maximum interaction force and the fact  
 225 that work depends on the length of the trajectory. These trends were confirmed by Friedman tests that revealed  
 226 significant main effects of assistance duration ( $W = 0.8$ ,  $Q_3 = 28.9$ ,  $p \leq 10^{-5}$ ), movement direction ( $W = 0.69$ ,  
 227  $Q_1 = 8.33$ ,  $p = 0.004$ ) and amplitude ( $W = 1$ ,  $Q_1 = 12$ ,  $p \leq 10^{-3}$ ). Since the main effect of movement amplitude  
 228 could be expected for the work, the associated post-hoc tests will not be described hereafter.

229 Wilcoxon-Nemenyi pairwise comparisons revealed that, for upward movements in SA, the participants expen-  
 230 deded more energy in the 200%, 400% and 600% conditions than in the 100% condition (in all cases:  $p \leq$   
 231  $7.31 \times 10^{-4}$ ,  $D \geq 1.66$ ). Moreover, participants expended significantly more energy in the 400% and 600%

232 conditions than in the 200% condition (in both cases:  $p \leq 0.017$ ,  $D \geq 1.06$ ).

233 The same trends were observed for upward movements for LA. Participants expended significantly more  
234 energy in the 200%, 400% and 600% conditions than in the 100% condition (in all cases:  $p \leq 0.046$ ,  $D \geq 0.98$ ).  
235 Furthermore, participants expended significantly more energy in the 600% condition than in the 200% and 400%  
236 conditions (in both cases:  $p \leq 0.02$ ,  $D \geq 1.11$ ). Furthermore, there was no significant effect of the assistance  
237 condition on the energy expended when moving downwards for both amplitudes. In sum, participants were  
238 willing to expend more and more energy as  $T_j$  increased for upward movements. For downward movements, the  
239 work remained nearly constant, as did the maximum of the applied force.

240 The analyses conducted on the effect of direction revealed that the work of interaction force was higher  
241 for downward movements than for upward movements performed in SA in the 100% condition ( $p = 0.0086$ ,  
242  $D = 1.26$ ). On the contrary, the work was always significantly higher for upward movements than for downward  
243 movements in the 400% condition (for both amplitudes:  $p \leq 0.0051$ ,  $D \geq 1.42$ ) and in the 600% condition (for  
244 both amplitudes:  $p \leq 0.0051$ ,  $D \geq 1.36$ ).

245 Interestingly, the nearly constant work of interaction force measured during downward movements (*i.e.*,  
246  $0.68 \pm 0.15$  J for SA and  $1.14 \pm 0.17$  J for LA) was remarkably close to the work of the human forearm's  
247 weight for both amplitudes (*i.e.*, 0.71 J for SA and 1.42 J for LA using anthropometric tables [50]). This is  
248 in agreement with the previous observations made on the relative maximum force applied by the participants.  
249 Therefore, this result confirms that the participants took advantage of gravity-related efforts to accelerate the  
250 exoskeleton during downward movements, without actively producing work. Indeed, since the exoskeleton was  
251 controlled to never miss the target at the end of the motion, participants did not even have to expend energy to  
252 decelerate the system when approaching the target.

253 Finally, we evaluated the model predictions regarding the work of interaction force with the AAE, as for  
254 the other two parameters (Fig. 7C,F). Here again, the MTE theory provided the best results in terms of AAE on  
255 work predictions. In particular, simulations performed with  $MD=T_j$  consistently resulted in a negative work of  
256 interaction force, meaning that the simulated participant either actively pulled (*i.e.*,  $\tau_h > 0$  in these downward  
257 simulations) or passively pushed (*i.e.*, the negative work is mainly due to weight in these upward simulations)  
258 against the exoskeleton. Furthermore, simulations performed with  $MD=T_{h,0}$  systematically overestimated the  
259 energy expenditure of the participants during the real experiment. In contrast, the MTE theory predicted well  
260 the work of interaction force across assistance durations  $T_j$ , amplitudes and movement directions.

### 261 3 Discussion

262 In the present paper, we examined the extent to which participants rely on a common time-effort tradeoff under  
263 conditions that induce low or high energy costs to move with a certain vigor. To manipulate the usual relation-  
264 ship between vigor and effort, we used a robotic exoskeleton that could either assist or resist the participant's  
265 motion. During upward movements, the results indicated that all participants saved time compared to the dura-  
266 tion planned by the robotic assistance, thereby demonstrating a high propensity to expend energy to save time.  
267 During downward movements, a similar time saving was achieved by switching to a low effort strategy, thereby  
268 showing that participants did not mechanically associate saving time with expending more energy. Overall, the  
269 observed behavior was consistent with the minimization of a time-effort tradeoff.

270 Indeed, all participants consistently expended substantial amounts of energy to save time during upward  
271 movements but did not return to their nominal vigor in the task. The reason is likely that, when outpacing the  
272 reference trajectory of the robot, a viscous resistance was applied. Consequently, returning to the nominal vigor  
273 would have been admittedly possible but extremely expensive from an energetic point of view. For example, the  
274 work required to move with their nominal vigor would have been about 12 J per movement for the 600% and  
275 LA condition, Fig. 7B). Nevertheless, the energy expenditure consented by the participants remained high during  
276 upward movements, with an average work of  $7.05 \pm 1.78$  J when pulling on the exoskeleton in this condition,

277 which corresponds to an average work rate of  $4.28 \pm 2.08$  J/s. For the sake of comparison, the work of the limb's  
278 weight when performing an unconstrained elbow flexion of amplitude LA (accounting for most of the energy  
279 cost in these self-paced movements) was around 1.42 J, which amounts to an average work rate of 1.21 J/s with  
280 the mean vigor of our participants. Overall, these findings demonstrate that participants were willing to produce  
281 at least  $3.6 \times$  their original work rate and spend about  $5 \times$  their usual energy expenditure to get closer to their  
282 nominal vigor in the task.

283 This observation suggests that a cost growing quickly with time must be represented in the planning of such  
284 goal-directed actions. Otherwise, it seems difficult to explain why participants would expend so much energy  
285 to increase vigor of such point-to-point movements. Clearly, this additional human effort was not dedicated to  
286 control the final accuracy since it was always handled by the robot itself near the target. Moreover, participants  
287 started to energize the motion since its beginning. An alternative argument could be that participants just im-  
288 plemented a simple heuristic to solve the task at hand, without optimizing a genuine time-effort compromise.  
289 The rationale could be that it is a natural strategy because people are used to expend energy to produce move-  
290 ment. However, duration, interaction force and work systematically tended to increase with the robot's planned  
291 duration during upward movements, which agrees with previous results obtained in an isometric task involving  
292 virtual movements [35]. The slower the assistance, the more participants pulled on the robot while consent-  
293 ing to reduce their vigor. This confirms that neither effort nor time were preserved or minimized alone across  
294 conditions. Interestingly, this energy expenditure pattern was very different for downward movements. Indeed,  
295 although MD followed a similar evolution, the energy expended by the participants was consistently very low  
296 across all assistance durations and significantly lower than for upward movements. Interestingly, the interaction  
297 measured in terms of force and work was indistinguishable from that of an inactive participant using only their  
298 weight to energize the motion planned by the exoskeleton. This capacity to exploit gravity is reminiscent of other  
299 results showing that the brain can optimally harness the effects of gravity to reduce effort during vertical arm  
300 movements [51–56].

301 Incidentally, this observation suggests that the strategy exhibited by participants during upward movements  
302 was not simply guided by a reluctance to inactivity. Nevertheless, in this task without explicit reward, it is  
303 unclear whether the hypothesized CoT only represents the temporal discounting of reward or not. Any type  
304 of cost growing with time could actually produce the same behavior. However, other authors have extensively  
305 studied how reward can affect movement vigor [14–19] and it is thus possible to assume that an implicit reward  
306 was associated with task achievement. By saving time on each trial, participants could leave the experiment  
307 earlier, which may be seen as a global reward as well. Since we did not explicitly manipulate reward in the task,  
308 we assumed that it was constant across conditions, which was reflected in our choice to use the same CoT in the  
309 model. Specifically, our paradigm modified the vigor-effort relationship by associating large or low effort costs  
310 to the nominal vigor of each participant in the task. This paradigm, together with the simulation results, provide  
311 evidence for the minimization of a common time-effort tradeoff across a wide range efforts, ranging from very  
312 active to mostly passive behaviors.

313 To derive our results, it is worth noting that we normalized the task to each nominal participant's vigor and  
314 maximal voluntary force. Indeed, it is known that there is a large inter-individual variability on these parameters  
315 [16, 17, 30, 31, 33, 35]. Interestingly, we found no correlation between the maximum force and the nominal vigor  
316 in our participants ( $R = -0.12$ ,  $p = 0.59$ ). Without normalization, the results might have been more variable  
317 across participants in the test session. For instance, vigorous participants could have been more prone to expend  
318 significant amounts of energy to save time. However, what is considered a significant amount of energy may  
319 also depend on the strength of the participant. To avoid such complications, we opted for a normalization in  
320 terms of time and effort. Other analyses (not shown) revealed that the inter-individual differences were not  
321 consistent across conditions in the test session. Moreover, no correlation was found between the three main  
322 parameters under investigation and the nominal vigor of participants. Finally, one limitation of our study is that  
323 the conclusions were drawn from a relatively small number of participants. However, the statistical effect sizes  
324 were generally high (in most cases  $D > 1$ ), meaning that our results reach a strong level of confidence. As

325 expected, a post-hoc power analysis confirmed these conclusions by reaching a power of 0.93 for the smallest  
326 reported Cohen's  $D$  (*i.e.*,  $D = 0.98$ ) and a power above 0.95 for all the other comparisons (*i.e.*, with  $D \geq 1.05$ ).

327 Beyond that limitation, we believe that there are several interesting implications of the present results. In  
328 particular, with the emergence of new technologies for assisting human movement such as exoskeletons or co-  
329 bots, vigor may become a key factor to induce a more symbiotic interaction, whether it be for neurorehabilitation  
330 or for the prevention of musculoskeletal disorders at work [57–61]. Yet, current assistive robots can be relatively  
331 slow for safety concerns or computational reasons. This may cause unanticipated effects if, as predicted by the  
332 MTE theory, humans prefer to expend energy to save time when interacting with a too slow robot. The present  
333 study suggests that even a small reduction of vigor could lead the participants to attempt to strongly energize  
334 the motion if possible or reject the technology otherwise. Although the present paper does not allow to assess  
335 how the participants would actually behave during more complex tasks, for example involving more degrees  
336 of freedom or strong accuracy constraints, it still provides an interesting piece of information for the field of  
337 human-robot interaction.

338 Finally, understanding the invigoration of human movements is also essential for a better understanding  
339 of Parkinson's disease, as underlined by several studies [62–65]. While bradykinesia is often associated with  
340 a misestimation of effort [62, 63], it could be equivalently explained by a misestimation of time [66]. One may  
341 speculate that the modulation of the basal ganglia's input signals, which are known to determine movement vigor  
342 as a result of a dopamine/serotonin equilibrium [6, 8, 64, 65, 67–71], could regulate the interplay between time and  
343 effort via the direct and indirect pathways. Further analyses of the neural substrates involved in the time-effort  
344 tradeoff would help to clarify the mechanisms involved in action selection, in particular when it comes to set  
345 movement invigoration.

## 346 4 Materials and Methods

### 347 4.1 Participants and materials

348 **Participants** A total of  $N = 12$  participants (7 females) were involved in the experiment (mean age  $28 \pm 6$  years  
349 old, mean height  $1.72 \pm 0.07$  m, mean weight  $64 \pm 12$  kg, mean flexors MVF  $236.5 \pm 93.4$  N and mean extensors  
350 MVF  $173.4 \pm 67.4$  N). All the participants were healthy, right-handed adults without known neurological disorder  
351 or injury that could have impacted the experiment. The participants gave their written informed consent as  
352 required by the Helsinki declaration to participate to the experiment, which was approved by the local ethical  
353 committee for research (CER-Paris-Saclay-2021-048).

354 **MVF bench test** Individual MVF was measured on a custom H-shaped test bench made of aluminum profile  
355 and screwed into the ground to prevent any unwanted movement. A force transducer (SPEC) was mounted on the  
356 bench. This transducer was turned upwards for tests conducted on elbow extensors and downwards for elbow  
357 flexors.

358 **Kinematics** Three-dimensional kinematics were measured by means of an optoelectronic motion capture de-  
359 vice (10 Oqus 500+ infrared cameras, 100 Hz; Qualisys, Gothenburg, Sweden). The device tracked the position of  
360 twelve 10 mm reflective markers taped on the robot and seven 10 mm reflective markers taped on the participant.  
361 The markers taped on the participant were used to control the posture a posteriori. All the kinematic analyses  
362 were conducted on the recorded data of the marker taped at the end-effector of the robot. These analyses were  
363 equivalent to use the markers taped on the participant given that the position of each participant with respect to  
364 the exoskeleton was constant in the tested motion range [72].

365 **Exoskeleton** The ABLE exoskeleton used in the experiment is an active upper-limb exoskeleton [73]. This ex-  
366 oskeleton was designed to be particularly compliant, which allowed to reach high levels of transparency [42, 74].

367 This exoskeleton replicates the three shoulder rotations (internal/external, adduction/abduction, flexion/exten-  
368 sion) and the elbow flexion/extension of the human arm. The investigations here were restricted to the elbow  
369 joint of the exoskeleton for simplicity and the other joints were thus mechanically locked. Furthermore, the phys-  
370 ical interfaces used to connect the human arm to the exoskeleton have been designed to maximize comfort and  
371 minimize unwanted interaction efforts [75, 76]. These developments were particularly important in the present  
372 context because the efforts transitioning at the level of the wrist interface could be intense, depending on the  
373 participant's will to move fast.

374 **Interaction efforts** A force-torque (FT) sensor (1010 Digital FT, ATI, maximum sample rate 7 kHz) was placed  
375 at the level of the wrist human-exoskeleton interface. This FT sensor could measure the six components (three  
376 forces and three torques) of the interaction efforts. During the present study, only the normal component of the  
377 interaction efforts was analyzed since it was the only one kinematically admissible by the human and exoskeleton  
378 elbow joints.

## 379 4.2 Experimental protocols

380 The baseline session was introduced to estimate the participants' nominal vigor and their MVF. This was used  
381 to design the subject-specific assistive control law and identify the average cost of time of the participants in  
382 the task. The test session was introduced to assess the extent to which participants implemented a MTE when  
383 interacting with an assistive exoskeleton programmed to move at different speeds.

### 384 4.2.1 Protocol of the baseline experiment

385 Before performing the pointing task with a transparent exoskeleton, the participants were asked to perform 6  
386 trials of maximum isometric voluntary force (MVF) of 5 s each. Half of these trials were used to assess the MVF  
387 of the elbow flexors (mainly the biceps brachii and the brachioradialis) and the other half were used to assess the  
388 MVF of the elbow extensors (mainly the different heads of the triceps brachii). The participants pushed against a  
389 force transducer while their arm was vertical and their forearm horizontal. The contact between the participant  
390 and the force transducer was made of a foam-covered part to minimize discomfort and was located just behind  
391 the styloid process of the radius (flexors MVF tests) or the styloid process of the ulna (extensors MVF tests). The  
392 MVF was defined as the maximum force measured during the three tests.

393 Then, the participants were placed inside the exoskeleton and stood on a height-adjustable platform so that  
394 the position of the exoskeleton was always the same regardless of the height of the participant. They were  
395 asked to perform 32 flexions and 32 extensions of the elbow of an amplitude  $A \in \{35^\circ, 26.25^\circ, 17.5^\circ, 8.75^\circ\}$  (8  
396 flexions and 8 extensions per amplitude) with the exoskeleton set in transparent mode (i.e. controller minimizing  
397 interaction efforts based on previous works [42, 43, 76]). Since only elbow flexions and extensions were required,  
398 the shoulder joints of the exoskeleton were mechanically locked. The target to reach to was defined as a green disk  
399 (4 cm diameter) displayed on a vertical screen and visual feedback of the current hand position was continuously  
400 displayed as a red disk cursor (1 cm diameter). The screen was placed at 1 m of the (fixed) elbow of the exoskeleton.  
401 The cursor position was updated in real-time to give a visual feedback of the current hand's position, defined at  
402 the interaction between the line of the exoskeleton forearm segment and the plane defined by the screen. In all  
403 cases, the participants were instructed to execute those visually-guided movements at their preferred velocity.  
404 Throughout the movement, the target to reach was continuously displayed and it disappeared once the participant  
405 had stayed within it for 2 s with a velocity below  $1 \text{ mm}\cdot\text{s}^{-1}$ . The subsequent target was then displayed and so  
406 on, thereby alternating upward and downward movements.



## 4.2.2 Protocol of the test session

In the test session, the participants performed a total of 4 blocks of 100 trials while the exoskeleton provided an assistance. Each block tested one of two amplitudes (i.e.  $A \in \{35^\circ, 17.5^\circ\}$ ) with the same initial posture  $q_i$ . Each block was divided in two sub-blocks of 25 trials testing different  $T_j$ . The order of occurrence of the amplitudes and  $T_j$  was pseudo-randomized across participants. Importantly, at the beginning of each sub-block, the participants were asked to relax using a message displayed on the screen for the first flexion and the first extension of each  $T_j$ . This allowed to let the participant feel which movement was planned by the robot and the kind of assistance they could receive when remaining inactive.

The assistive control law was designed via a proportional-integral (PI) controller, the gains of which were set to allow the exoskeleton to track the reference trajectory in presence of the participant, when the switch to a viscous resistance was deactivated. The robot reference trajectory was derived from a minimum jerk model [47, 48]. This model is commonly accepted to generate smooth and bell-shaped velocity profiles. Despite known limits to capture velocity asymmetries observed due to gravity or accuracy [49, 77], this model was sufficient here to provide a human-like reference trajectory to be tracked by the PI controller. Precisely, the exoskeleton was controlled in position to minimize the tracking error  $e = q_j - q$ , where  $q$  is the actual joint position of the robot and  $q_j$  (i.e., the desired robot trajectory) is defined as follows:

$$q_j(t) = q_i + A(10(t/T_j)^3 - 15(t/T_j)^4 + 6(t/T_j)^5) \quad (2)$$

with  $q_i$  the initial joint position of the robot,  $T_j$  the robot's movement duration determined after identification of the individual preferred duration  $T_n$  for amplitude  $A$  (with  $A \in \{35^\circ, 17.5^\circ\}$ ).

Once the assistance allowed the participant to reach to the target while remaining passive and without allowing the exoskeleton to switch its control mode, we considered the case where the participant could accelerate the motion, whether it be passively (with weight) or actively (meaning  $\tau_h \neq 0$ ). Since the gains of the PI controller were high enough to ensure a good tracking of the minimum jerk trajectory with the user inside the exoskeleton, the participant would not be able to significantly deviate from that trajectory without implementing an additional control mechanism. Therefore, to test our hypothesis, we introduced a criterion to detect when a participant overtook the robot and then switched to a viscous-like resistance while deactivating the PI controller.

The viscous-like torque resisting the human input was proportional to difference between the measured velocity ( $\dot{q}$ ) and the reference jerk velocity ( $\dot{q}_j$ ). This viscous resistance was standardized according to the MVF of each participant, which resulted in the following expression:

$$\tau_v = \begin{cases} \sigma \alpha \text{MVF} (\dot{q} - \dot{q}_j) & \text{if } \sigma(q - q_j) > \delta \\ = 0 & \text{otherwise} \end{cases} \quad (3)$$

where  $\delta = 0.02$  rad is the deviation from the planned jerk trajectory in the direction of the movement ( $\sigma = 1$  and  $\sigma = -1$  for flexions and extensions respectively) and  $\alpha = 0.1$  is the resistance's strength set to 10% of the MVF. The deviation  $\delta$  was chosen so that weight was sufficient to outpace the exoskeleton for downward movements. Near the end of each movement, the robot was position controlled to ensure that the target was always accurately reached. This allowed to remove accuracy concerns for the participant and to minimize endpoint variance by design, thereby avoiding any unwanted speed-accuracy trade-off which could influence movement duration [37, 41, 49].

## 4.3 Data analysis

**Kinematics** Three-dimensional position data of the marker placed on the exoskeleton's end-effector were used to assess the movement kinematics. Position data from the other markers was used as control to monitor residual motions. Position data were filtered (low-pass Butterworth, 5 Hz cutoff, fifth-order, zero-phase distortion, *butter* function from the *scipy* package) as in previous studies [55, 72, 77]. Then, velocity and acceleration were obtained

447 by numerical differentiation. Movements were segmented using a threshold set at 5% of the peak velocity of the  
448 considered movement.

449 For each participant, a vigor score ( $vg_n$ ) was computed following pre-existing methods based on movement  
450 durations [31, 35], as follows:

$$vg_n = \frac{\sum_{i=1}^4 T(A_i)^2}{\sum_{i=1}^4 T_n(A_i)T(A_i)} \quad (4)$$

451 where  $T(A_i)$  is the average duration computed from the population-based Equation 1 for amplitude  $A_i$ , and  
452  $T_n(A_i)$  is the averaged movement duration of the  $n^{th}$  participant for amplitude  $A_i$ . If the computed  $vg_n$  is above  
453 1, it means that the concerned participant moved overall faster than the population average. On the contrary, if  
454 the computed  $vg_n$  is below 1, it means that the concerned participant moved overall slower than the population  
455 average.

456 **Interaction efforts** As previously stated, the normal component of the interaction efforts was used to assess  
457 the force applied by the participants on the robot. These efforts were filtered (low-pass Butterworth, 5 Hz cutoff,  
458 fifth-order, zero-phase distortion, *butter* function from the *scipy* package) and segmented on the basis of the  
459 kinematic segmentation.

#### 460 4.4 Statistical analysis

461 The statistical analyses were conducted using custom Python 3.8 scripts and the Pingouin package [78]. The  
462 normality (*Shapiro-Wilk* [79]) and sphericity (*Mauchly's* [80]) of the data distribution were first verified. Since  
463 the results of these verification were not positive, Friedman tests were performed to check for possible main  
464 effects of the condition, the direction and the amplitude of movement. The significance level of the Friedman  
465 tests was set at  $p < 0.05$ .

466 Post-hoc comparisons were performed by means of non parametric pairwise Wilcoxon-Nemenyi compar-  
467 isons. Their significance level was set at  $p < 0.05$  and for each test the Cohen's  $D$  was computed to analyze the  
468 effect size.

469 Finally, for information, a post-hoc power analysis was performed using the G\*Power software (version  
470 3.1.9.7, [81, 82]) in post-hoc mode with  $\alpha = 0.05$  and with the Cohen's  $D$  reported in the paper.

#### 471 4.5 Optimal control simulations

##### 472 4.5.1 CoT estimation

473 The CoT was identified on the basis of the averaged linear amplitude-duration relationship across all participants  
474 and directions (i.e.  $T(A) = 2.545A + 0.445$ ,  $r^2 = 0.99$ ). The following model of the interaction dynamics was  
475 used when the robot was controlled in transparent mode:

$$J_h \ddot{q} = \tau_h - l_h m_h g \cos(q) - B_h \dot{q} \quad (5)$$

476 where  $J_h = 0.043 \text{ kg.m}^2$  was the human inertia,  $m_h = 1.42 \text{ kg}$  was the human forearm plus hand mass,  
477  $l_h = 0.17 \text{ m}$  the distance between the elbow and the center of gravity of the forearm plus hand ensemble  
478 (these three population-average parameters were computed on the basis of anthropometric tables [50]) and  
479  $B_h = 0.05 \text{ Nm.s.rad}^{-1}$  was the viscous coefficient of the elbow (this value was obtained in a previous study  
480 [83]). The joint position (respectively velocity and acceleration) was denoted by  $q$  (respectively  $\dot{q}$ ,  $\ddot{q}$ ). The as-  
481 sumption of perfect transparency was coherent with previous control developments [42, 43, 76], which allowed  
482 to cancel the significant effects of the exoskeleton on movement duration and peak velocity.

483 The minimum commanded torque change model was used in the present paper to predict human movement  
 484 [84]. As a consequence, the state was defined as  $\mathbf{x} = (q, \dot{q}, \tau_h)^\top$  and the control variable was defined as  $u_h = \dot{\tau}_h$ .  
 485 The cost function used to simulate movements from a starting state  $\mathbf{x}_i = (q_i, 0, m_h g l \cos(q_i))^\top$  to a final state  
 486  $\mathbf{x}_f = (q_f, 0, m_h g l \cos(q_f))^\top$  in transparent mode and identify the CoT was as follows:

$$C(u_h) = \int_0^T u_h(t)^2 dt \quad (6)$$

487 where  $T$  was estimated from the averaged amplitude-duration relationship for a given amplitude  $A = |q_f - q_i|$ .  
 488 Then the procedure described by Equations S.1–S.3, based on the deterministic optimal control theory was applied  
 489 to identify the CoT [29, 85]. After this procedure, our model was able to predict the nominal vigor of the average  
 490 individual. Indeed, the addition of the CoT to the movement cost  $C(u_h)$  yielded exactly the optimal duration  
 491 corresponding to the experimental one for a movement joining  $\mathbf{x}_i$  to  $\mathbf{x}_f$ .

#### 492 4.5.2 Simulations of possible behaviors with the assistance

493 Our experiment induced two main scenarios: one in which it was only possible to save time at the cost of an  
 494 important energy expenditure (upward movements) and one in which being essentially inactive was sufficient to  
 495 save time (downward movements). These two configurations were simulated separately given they suppose quite  
 496 different interaction dynamics. Furthermore, each of these main configurations induced three possible scenarios:  
 497 1) actively pulling or pushing in the direction of the target (red shaded areas in Figures 1B,C), 2) remaining inactive  
 498 (which is passively pushing, black dotted lines in Figures 1B,C) and 3) actively pushing or pulling in the opposite  
 499 direction to the target (blue areas in Figures 1B,C). The latter scenario was unlikely from the MTE viewpoint and  
 500 hardly doable in practice during upward movements because the assistance was performed by a relatively strong  
 501 position control of the robot.

502 **Prediction of human behavior when saving time is energetically expensive** First, the behavior of partic-  
 503 ipants in a situation that did not allow saving time without expending energy was simulated (which corresponds  
 504 to the red area in Figure 1B). This scenario was tested during upward movements with the jerk assistance in the  
 505 present experiment. If the participant wanted to save time in this case, they needed to take control of both their  
 506 own and the exoskeleton's dynamics while counteracting the viscous resistance. The system dynamics was thus  
 507 formulated as in Equation 7, and simulated from an initial state  $\mathbf{x}_i = (q_i, 0, (l_h m_h + l_r m_r) g \cos(q_i))^\top$  to a final  
 508 state  $\mathbf{x}_f = (q_f, 0, (l_h m_h + l_r m_r) g \cos(q_f))^\top$ .

$$J_{tot} \ddot{q} = \tau_h - B_{tot} \dot{q} - [\tau_v]_+ - (l_h m_h + l_r m_r) g \cos(q) \quad (7)$$

509 where  $\tau_h$  is the human torque,  $J_{tot} = J_h + J_r$  is the total inertia of the coupled system,  $B_{tot} = B_h + B_r$   
 510 is the total viscous torque of the human and exoskeleton elbows respectively and  $(l_h m_h + l_r m_r)$  is the total mass-  
 511 length product inducing gravity related torques. The values of human parameters were the same as in Equation  
 512 5. The values of robot parameters were  $J_r = 0.3 \text{ kg.m}^2$ ,  $B_r = 0.12 \text{ Nm.s.rad}^{-1}$  and  $l_r m_r = 0.26 \text{ kg.m}$ , which  
 513 were identified following a preexisting procedure [42]. Finally,  $[\tau_v]_+$  denotes that only the positive part of the  
 514 viscous resistance is taken into account to prevent it from becoming an assistance at the end of the simulated  
 515 movements (when  $\dot{q} < \dot{q}_{jerk}$ , see the end of velocity profiles when  $T_j \neq 100\% T_{h,0}$  in Figure 4A).

516 In the 100% condition simulations, participants tended to synchronize with the exoskeleton. Therefore, the  
 517 torque applied by the assistance  $\tau_j$  was added to Equation 7. In the other conditions, this torque was not taken into  
 518 account in the dynamics because participants systematically moved faster than the assistance, which deactivated  
 519 it. Instead, the cost of following the assistance was computed separately (see blue vertical dotted line in Figure  
 520 1B for an illustration).

521 Finally, all these simulations were performed in free time (i.e. final time  $T \in (0, T_j]$ ) using an objective cost  
 522 function that minimizes a compromise between time and effort as in Equation 6, using the previously identified

523 CoT. This leads to an optimal movement time, illustrated by the black disk in Figure 1B). This cost function was  
524 as follows,

$$C(u_h) = \int_0^T u_h(t)^2 dt + \int_0^T g(t) dt \quad (8)$$

525 The MTE compromise computed with Equation 8 was then compared to the cost of following the assistance,  
526 which outputs are represented in blue in Figures 5–7, and to the cost of always moving at the preferred velocity,  
527 which outputs are represented in red in Figures 5–7.

528 **Prediction of human behavior when saving time while being inactive is possible** Second, the behavior  
529 of participants when saving time was not necessarily energetically expensive was simulated (which corresponds  
530 to both the red area and black dotted line in Figure 1D). This case corresponded to downward movements with  
531 the jerk assistance in the present experiment. In this scenario, the weight of the participant and of the exoskeleton  
532 was helping to save time and naturally counterbalancing the viscous resistance. Moreover, the position control  
533 implemented at the beginning and end of movements allowed participants to be completely relieved of weight  
534 control if they wished to. In that case, only the inertia and natural viscosity of the human and robot segments  
535 and joints were handled by the participant. The system dynamics was thus simulated as in Equation 9, from an  
536 initial state  $\mathbf{x}_i = (q_i, 0, 0)^\top$  to a final state  $\mathbf{x}_f = (q_f, 0, 0)^\top$ .

$$J_{tot}\ddot{q} = \tau_h - B_{tot}\dot{q} + [\tau_v - (l_h m_h + l_r m_r) g \cos(q)]_+ \quad (9)$$

537 During simulations of downward movements, and contrary to those predicting upward movements, gravity  
538 related torques were directly compared to the viscous resistance and only positive values were taken into account  
539 in the dynamics. This simulated a natural compensation of all or a part of the viscous resistance by weight if  
540 participants pushed downwards or remained inactive (which corresponds to both the red area and black dotted  
541 line in Figure 1D). The simulations were then performed in free final time (i.e.  $T \in (0, T_j]$ ) using the same  
542 objective cost function as for upward movements (see Equation 8).

543 Finally, the case of participants pulling upwards in the opposite direction to the target was only simulated  
544 for a duration corresponding to  $T_j$  as an illustration (represented in blue in Figures 5–7). Indeed, the cost of  
545 movement is trivially higher in that case given it induces an increase in both the cost of effort and the CoT (see  
546 dashed and dotted curves in the blue area in Figure 1D).

547 All the simulation parameters reported in the present paper were either direct results of the optimal control  
548 problem (relative movement duration) or computed using classical dynamics (interaction forces and work). All  
549 the simulations were performed using the Matlab (MathWorks) version of *gpops2* [86–88], which is a software  
550 based on an orthogonal collocation method relying on the *SNOPT* solver to solve the nonlinear programming  
551 problem [89].

## References

- [1] R. Shadmehr and A. A. Ahmed, *Vigor : neuroeconomics of movement control*. The MIT Press, 2020.
- [2] J. T. Dudman and C. R. Gerfen, “The basal ganglia,” in *The Rat Nervous System*, pp. 391–440, Elsevier, 2015.
- [3] J. T. Dudman and J. W. Krakauer, “The basal ganglia: from motor commands to the control of vigor,” *Current Opinion in Neurobiology*, vol. 37, pp. 158–166, apr 2016.
- [4] J. D. Salamone, “Dopamine, behavioral economics, and effort,” *Frontiers in Behavioral Neuroscience*, vol. 3, pp. 1–12, 2009.

- [5] S. M. Nicola, “The flexible approach hypothesis: unification of effort and cue-responding hypotheses for the role of nucleus accumbens dopamine in the activation of reward-seeking behavior,” *Journal of Neuroscience*, vol. 30, pp. 16585–16600, dec 2010.
- [6] Y. Tachibana and O. Hikosaka, “The primate ventral pallidum encodes expected reward value and regulates motor action,” *Neuron*, vol. 76, pp. 826–837, nov 2012.
- [7] I. Opris, M. Lebedev, and R. J. Nelson, “Motor planning under unpredictable reward: modulations of movement vigor and primate striatum activity,” *Frontiers in Neuroscience*, vol. 5, pp. 1–12, 2011.
- [8] N. Kim, J. W. Barter, T. Sukharnikova, and H. H. Yin, “Striatal firing rate reflects head movement velocity,” *European Journal of Neuroscience*, vol. 40, pp. 3481–3490, sep 2014.
- [9] P. E. Rueda-Orozco and D. Robbe, “The striatum multiplexes contextual and kinematic information to constrain motor habits execution,” *Nature Neuroscience*, vol. 18, pp. 453–460, jan 2015.
- [10] M.-T. Jurado-Parras, M. Safaie, S. Sarno, J. Louis, C. Karoutchi, B. Berret, and D. Robbe, “The dorsal striatum energizes motor routines,” *Current Biology*, vol. 30, pp. 4362–4372.e6, nov 2020.
- [11] E. M. Summerside, R. Shadmehr, and A. A. Ahmed, “Vigor of reaching movements: reward discounts the cost of effort,” *Journal of Neurophysiology*, vol. 119, pp. 2347–2357, jun 2018.
- [12] R. Shadmehr, T. R. Reppert, E. M. Summerside, T. Yoon, and A. A. Ahmed, “Movement vigor as a reflection of subjective economic utility,” *Trends in Neurosciences*, vol. 42, pp. 323–336, may 2019.
- [13] R. Shadmehr and A. A. Ahmed, “Précis of “vigor: neuroeconomics of movement control”,” *Behavioral and Brain Sciences*, vol. 44, pp. 1–42, dec 2020.
- [14] K. Jimura, J. Myerson, J. Hilgard, T. S. Braver, and L. Green, “Are people really more patient than other animals? evidence from human discounting of real liquid rewards,” *Psychonomic Bulletin & Review*, vol. 16, pp. 1071–1075, dec 2009.
- [15] M. Xu-Wilson, D. S. Zee, and R. Shadmehr, “The intrinsic value of visual information affects saccade velocities,” *Experimental Brain Research*, vol. 196, pp. 475–481, jun 2009.
- [16] T. R. Reppert, K. M. Lempert, P. W. Glimcher, and R. Shadmehr, “Modulation of saccade vigor during value-based decision making,” *Journal of Neuroscience*, vol. 35, pp. 15369–15378, nov 2015.
- [17] K. Sackaloo, E. Strouse, and M. S. Rice, “Degree of preference and its influence on motor control when reaching for most preferred, neutrally preferred, and least preferred candy,” *OTJR: Occupation, Participation and Health*, vol. 35, pp. 81–88, feb 2015.
- [18] S. G. Manohar, T. T.-J. Chong, M. A. J. Apps, A. Batla, M. Stamelou, P. R. Jarman, K. P. Bhatia, and M. Husain, “Reward pays the cost of noise reduction in motor and cognitive control,” *Current Biology*, vol. 25, pp. 1707–1716, jun 2015.
- [19] S. G. Manohar, R. D. Finzi, D. Drew, and M. Husain, “Distinct motivational effects of contingent and non-contingent rewards,” *Psychological Science*, vol. 28, pp. 1016–1026, may 2017.
- [20] R. Shadmehr, “Control of movements and temporal discounting of reward,” *Current Opinion in Neurobiology*, vol. 20, pp. 726–730, dec 2010.
- [21] R. Shadmehr, J. J. O. de Xivry, M. Xu-Wilson, and T.-Y. Shih, “Temporal discounting of reward and the cost of time in motor control,” *Journal of Neuroscience*, vol. 30, pp. 10507–10516, aug 2010.

- [22] A. M. Haith, T. R. Reppert, and R. Shadmehr, “Evidence for hyperbolic temporal discounting of reward in control of movements,” *The Journal of Neuroscience*, vol. 32, pp. 11727–11736, aug 2012.
- [23] O. Codol, P. J. Holland, S. G. Manohar, and J. M. Galea, “Reward-based improvements in motor control are driven by multiple error-reducing mechanisms,” *The Journal of Neuroscience*, vol. 40, pp. 3604–3620, mar 2020.
- [24] T. Yoon, R. B. Geary, A. A. Ahmed, and R. Shadmehr, “Control of movement vigor and decision making during foraging,” *Proceedings of the National Academy of Sciences*, vol. 115, pp. 1–10, oct 2018.
- [25] J. S. Brown, “Model validation: optimal foraging theory,” in *Design and analysis of ecological experiments*, pp. 360–377, Chapman and Hall/CRC, 2020.
- [26] S. Sukumar, R. Shadmehr, and A. A. Ahmed, “Effects of reward history on decision-making and movement vigor,” *bioRxiv*, jul 2021.
- [27] C. C. Korbisich, D. R. Apuan, R. Shadmehr, and A. A. Ahmed, “Saccade vigor reflects the rise of decision variables during deliberation,” *Current Biology*, vol. 32, pp. 5374–5381, nov 2022.
- [28] B. Hoff, “A model of duration in normal and perturbed reaching movement,” *Biological Cybernetics*, vol. 71, pp. 481–488, oct 1994.
- [29] B. Berret and F. Jean, “Why Don’t We Move Slower? The Value of Time in the Neural Control of Action,” *Journal of Neuroscience*, vol. 36, pp. 1056–1070, Jan. 2016.
- [30] J. E. S. Choi, P. A. Vaswani, and R. Shadmehr, “Vigor of movements and the cost of time in decision making,” *Journal of Neuroscience*, vol. 34, pp. 1212–1223, jan 2014.
- [31] B. Berret, C. Castanier, S. Bastide, and T. Deroche, “Vigour of self-paced reaching movement: cost of time and individual traits,” *Scientific Reports*, vol. 8, no. 1, p. 10655, 2018.
- [32] T. R. Reppert, I. Rigas, D. J. Herzfeld, E. Sedaghat-Nejad, O. Komogortsev, and R. Shadmehr, “Movement vigor as a traitlike attribute of individuality,” *Journal of Neurophysiology*, vol. 120, pp. 741–757, aug 2018.
- [33] O. Labaune, T. Deroche, C. Teulier, and B. Berret, “Vigor of reaching, walking, and gazing movements: on the consistency of interindividual differences,” *Journal of Neurophysiology*, vol. 123, pp. 234–242, jan 2020.
- [34] R. E. Carlisle and A. D. Kuo, “Optimization of energy and time predicts dynamic speeds for human walking,” *eLife*, vol. 12, feb 2023.
- [35] B. Berret and G. Baud-Bovy, “Evidence for a cost of time in the invigoration of isometric reaching movements,” *Journal of Neurophysiology*, vol. 127, pp. 689–701, feb 2022.
- [36] R. Shadmehr, H. J. Huang, and A. A. Ahmed, “A representation of effort in decision-making and motor control,” *Current Biology*, vol. 26, pp. 1929–1934, jul 2016.
- [37] C. M. Harris and D. M. Wolpert, “Signal-dependent noise determines motor planning,” *Nature*, vol. 394, pp. 780–784, aug 1998.
- [38] L. C. Hunter, E. C. Hendrix, and J. C. Dean, “The cost of walking downhill: Is the preferred gait energetically optimal?,” *Journal of Biomechanics*, vol. 43, pp. 1910–1915, jul 2010.
- [39] C. Wang, Y. Xiao, E. Burdet, J. Gordon, and N. Schweighofer, “The duration of reaching movement is longer than predicted by minimum variance,” *Journal of Neurophysiology*, vol. 116, pp. 2342–2345, nov 2016.

- [40] M. B. Yandell and K. E. Zelik, “Preferred barefoot step frequency is influenced by factors beyond minimizing metabolic rate,” *Scientific Reports*, vol. 6, p. 23243, mar 2016.
- [41] B. Berret, A. Conessa, N. Schweighofer, and E. Burdet, “Stochastic optimal feedforward-feedback control determines timing and variability of arm movements with or without vision,” *PLOS Computational Biology*, vol. 17, p. e1009047, jun 2021.
- [42] D. Verdel, S. Bastide, N. Vignais, O. Bruneau, and B. Berret, “An identification-based method improving the transparency of a robotic upper-limb exoskeleton,” *Robotica*, vol. 39, pp. 1711–1728, Sept. 2021.
- [43] D. Verdel, S. Bastide, O. Bruneau, B. Berret, and N. Vignais, “Improving and quantifying the transparency of an upper-limb robotic exoskeleton with a force sensor and electromyographic measures,” *46ème Congrès Société Biomécanique, Computer Methods in Biomechanics and Biomedical Engineering*, vol. 24:sup1, pp. 261–263, 2021.
- [44] S. J. Young, J. Pratt, and T. Chau, “Target-directed movements at a comfortable pace: movement duration and fitts’s law,” *Journal of Motor Behavior*, vol. 41, pp. 339–346, July 2009.
- [45] O. Labaune, T. Deroche, C. Castanier, and B. Berret, “On the perception of movement vigour,” *Quarterly Journal of Experimental Psychology*, p. 174702182211409, nov 2022.
- [46] S. Bastide, N. Vignais, F. Geffard, and B. Berret, “Interacting with a “transparent” upper-limb exoskeleton: a human motor control approach,” *IEEE/RSJ International Conference on Intelligent Robots and Systems (IROS)*, pp. 4661–4666, 2018.
- [47] N. Hogan, “An organizing principle for a class of voluntary movements,” *The Journal of Neuroscience*, vol. 4, pp. 2745–2754, nov 1984.
- [48] T. Flash and N. Hogan, “The coordination of arm movements: an experimentally confirmed mathematical model,” *The Journal of Neuroscience*, vol. 5, pp. 1688–1703, jul 1985.
- [49] P. M. Fitts, “The information capacity of the human motor system in controlling the amplitude of movement,” *Journal of Experimental Psychology*, vol. 47, pp. 381–391, June 1954.
- [50] D. A. Winter, *Biomechanics and motor control of human movement*, vol. 1 of *John Wiley and Sons*. New York: New York: John Wiley and Sons, second ed., 1990.
- [51] B. Berret, C. Darlot, F. Jean, T. Pozzo, C. Papaxanthis, and J. P. Gauthier, “The inactivation principle: mathematical solutions minimizing the absolute work and biological implications for the planning of arm movements,” *PLoS Computational Biology*, vol. 4, p. e1000194, oct 2008.
- [52] F. Crevecoeur, J.-L. Thonnard, and P. Lefèvre, “Optimal integration of gravity in trajectory planning of vertical pointing movements,” *Journal of Neurophysiology*, vol. 102, pp. 786–796, aug 2009.
- [53] L. Bringoux, J. Blouin, T. Coyle, H. Ruget, and L. Mouchnino, “Effect of gravity-like torque on goal-directed arm movements in microgravity,” *Journal of Neurophysiology*, vol. 107, pp. 2541–2548, may 2012.
- [54] J. Gaveau, B. Berret, D. E. Angelaki, and C. Papaxanthis, “Direction-dependent arm kinematics reveal optimal integration of gravity cues,” *eLife*, vol. 5, pp. 1–17, Nov. 2016.
- [55] J. Gaveau, S. Grospretre, B. Berret, D. E. Angelaki, and C. Papaxanthis, “A cross-species neural integration of gravity for motor optimization,” *Science Advances*, vol. 7, p. eabf7800, apr 2021.

- [56] D. Verdel, S. Bastide, F. Geffard, O. Bruneau, N. Vignais, and B. Berret, “Fast reoptimization of human motor patterns in non-Earth gravity fields locally induced by a robotic exoskeleton,” *bioRxiv*, nov 2022.
- [57] M. P. de Looze, T. Bosch, F. Krause, K. S. Stadler, and L. W. O’Sullivan, “Exoskeletons for industrial application and their potential effects on physical work load,” *Ergonomics*, vol. 59, pp. 671–681, May 2016.
- [58] J. Theurel, K. Desbrosses, T. Roux, and A. Savescu, “Physiological consequences of using an upper limb exoskeleton during manual handling tasks,” *Applied Ergonomics*, vol. 67, pp. 211–217, 2018.
- [59] J. L. Pons, “Rehabilitation exoskeletal robotics,” *IEEE engineering in medicine and biology magazine*, vol. 29, pp. 57–63, may 2010.
- [60] N. Jarrassé, T. Proietti, V. Crocher, J. Robertson, A. Sahbani, G. Morel, and A. Roby-Brami, “Robotic exoskeletons: a perspective for the rehabilitation of arm coordination in stroke patients,” *Frontiers in Human Neuroscience*, vol. 8, pp. 1–13, Dec. 2014.
- [61] J. Mehrholz, A. Pollock, M. Pohl, J. Kugler, and B. Elsner, “Systematic review with network meta-analysis of randomized controlled trials of robotic-assisted arm training for improving activities of daily living and upper limb function after stroke,” *Journal of NeuroEngineering and Rehabilitation*, vol. 17, pp. 1–14, jun 2020.
- [62] P. Mazzoni, A. Hristova, and J. W. Krakauer, “Why don't we move faster? parkinson's disease, movement vigor, and implicit motivation,” *Journal of Neuroscience*, vol. 27, pp. 7105–7116, jul 2007.
- [63] P. Baraduc, S. Thobois, J. Gan, E. Broussolle, and M. Desmurget, “A common optimization principle for motor execution in healthy subjects and parkinsonian patients,” *Journal of Neuroscience*, vol. 33, pp. 665–677, jan 2013.
- [64] B. Panigrahi, K. A. Martin, Y. Li, A. R. Graves, A. Vollmer, L. Olson, B. D. Mensh, A. Y. Karpova, and J. T. Dudman, “Dopamine is required for the neural representation and control of movement vigor,” *Cell*, vol. 162, pp. 1418–1430, sep 2015.
- [65] J. A. da Silva, F. Tecuapetla, V. Paixão, and R. M. Costa, “Dopamine neuron activity before action initiation gates and invigorates future movements,” *Nature*, vol. 554, pp. 244–248, jan 2018.
- [66] M. A. Pastor, J. Artieda, M. Jahanshahi, and J. A. Obeso, “Time estimation and reproduction is abnormal in Parkinson’s disease,” *Brain*, vol. 115, no. 1, pp. 211–225, 1992.
- [67] R. Kawagoe, Y. Takikawa, and O. Hikosaka, “Expectation of reward modulates cognitive signals in the basal ganglia,” *Nature Neuroscience*, vol. 1, pp. 411–416, sep 1998.
- [68] R. S. Turner, M. Desmurget, J. Grethe, M. D. Crutcher, and S. T. Grafton, “Motor subcircuits mediating the control of movement extent and speed,” *Journal of Neurophysiology*, vol. 90, pp. 3958–3966, dec 2003.
- [69] S. Kobayashi and W. Schultz, “Influence of reward delays on responses of dopamine neurons,” *Journal of Neuroscience*, vol. 28, pp. 7837–7846, jul 2008.
- [70] C. Varazzani, A. San-Galli, S. Gilardeau, and S. Bouret, “Noradrenaline and dopamine neurons in the reward/-effort trade-off: a direct electrophysiological comparison in behaving monkeys,” *Journal of Neuroscience*, vol. 35, pp. 7866–7877, may 2015.
- [71] A. L. Collins, V. Y. Greenfield, J. K. Bye, K. E. Linker, A. S. Wang, and K. M. Wassum, “Dynamic mesolimbic dopamine signaling during action sequence learning and expectation violation,” *Scientific Reports*, vol. 6, p. 20231, feb 2016.



- [72] D. Verdel, S. Bastide, N. Vignais, O. Bruneau, and B. Berret, "Human weight compensation with a back-drivable upper-limb exoskeleton: identification and control," *Frontiers in Bioengineering and Biotechnology*, vol. 9, pp. 1–16, jan 2022.
- [73] P. Garrec, J.-P. Friconeau, Y. Méasson, and Y. Perrot, "ABLE, an Innovative Transparent Exoskeleton for the Upper-Limb," *IEEE/RSJ International Conference on Intelligent Robots and Systems (IROS)*, pp. 1483–1488, Sept. 2008.
- [74] P. Garrec, "Screw and Cable Actuators (SCS) and Their Applications to Force Feedback Teleoperation, Exoskeleton and Anthropomorphic Robotics," *Robotics 2010 Current and Future Challenges*, pp. 167–191, 2010.
- [75] N. Jarrasse and G. Morel, "Connecting a Human Limb to an Exoskeleton," *IEEE Transactions on Robotics*, vol. 28, pp. 697–709, June 2012.
- [76] D. Verdel, G. Sahn, S. Bastide, O. Bruneau, B. Berret, and N. Vignais, "Influence of the physical interface on the quality of human–exoskeleton interaction," *IEEE Transactions on Human-Machine Systems*, vol. 53, no. 1, pp. 44–53, 2022.
- [77] J. Gaveau, B. Berret, L. Demougeot, L. Fadiga, T. Pozzo, and C. Papaxanthis, "Energy-related optimal control accounts for gravitational load: comparing shoulder, elbow, and wrist rotations," *Journal of Neurophysiology*, pp. 4–16, 2014.
- [78] R. Vallat, "Pingouin: statistics in python," *Journal of Open Source Software*, vol. 3, p. 1026, nov 2018.
- [79] S. S. Shapiro and M. B. Wilk, "An analysis of variance test for normality (complete samples)," *Biometrika*, vol. 52, p. 591, dec 1965.
- [80] J. W. Mauchly, "Significance test for sphericity of a normal  $n$ -variate distribution," *The Annals of Mathematical Statistics*, vol. 11, pp. 204–209, jun 1940.
- [81] F. Faul, E. Erdfelder, A.-G. Lang, and A. Buchner, "G\*power3 : Aflexiblestatisticalpoweranalysisprogramforthesocial, behavioral, andbiomedicalsciences," *Behavior Research Methods*, pp. 191–191, may2007.
- [82] F. Faul, E. Erdfelder, A. Buchner, and A.-G. Lang, "Statistical power analyses using g\*power3.1 : Testsfor correlationand regressionanalyses," *Behavior Research Methods*, vol. 41, pp. 1149 – 1160, nov2009.
- [83] G. Venture, K. Yamane, Y. Nakamura, and M. Hirashima, "Estimating viscoelastic properties of human limb joints based on motion capture and robotic identification technologies," in *2007 IEEE/RSJ International Conference on Intelligent Robots and Systems*, pp. 624–629, oct 2007.
- [84] E. Nakano, H. Imamizu, R. Osu, Y. Uno, H. Gomi, T. Yoshioka, and M. Kawato, "Quantitative examinations of internal representations for arm trajectory planning: minimum commanded torque change model," *Journal of Neurophysiology*, vol. 81, pp. 2140–2155, may 1999.
- [85] L. S. Pontryagin, V. Boltyanskii, R. V. Gamkrelidze, and E. F. Mishchenko, *The mathematical theory of optimal processes*. Oxford: Pergamon, 1964.
- [86] D. A. Benson, G. T. Huntington, T. P. Thorvaldsen, and A. V. Rao, "Direct trajectory optimization and costate estimation via an orthogonal collocation method," *Journal of Guidance, Control, and Dynamics*, vol. 29, pp. 1435–1440, nov 2006.

- [87] D. Garg, M. Patterson, W. W. Hager, A. V. Rao, D. A. Benson, and G. T. Huntington, “A unified framework for the numerical solution of optimal control problems using pseudospectral methods,” *Automatica*, vol. 46, pp. 1843–1851, nov 2010.
- [88] A. V. Rao, D. A. Benson, C. Darby, M. A. Patterson, C. Francolin, I. Sanders, and G. T. Huntington, “GPOPS, a Matlab software for solving multiple-phase optimal control problems using the Gauss pseudospectral method,” *ACM Transactions on Mathematical Software*, vol. 37, pp. 1–39, apr 2010.
- [89] P. E. Gill, W. Murray, and M. A. Saunders, “SNOPT: an SQP algorithm for large-scale constrained optimization,” *SIAM Review*, vol. 47, pp. 99–131, jan 2005.

## Acknowledgments

This work is supported by the French National Agency for Research (grant ANR-19-CE33-0009, EXOMAN project and grant ANR-22-CE37-0010, BasalCost project).

**Author contributions:** Conceptualization: DV, OB, NV, BB.

Methodology: DV, BB.

Investigation: DV, GS, BB.

Data processing: DV.

Visualization: DV.

Supervision: OB, NV, BB.

Writing - original draft: DV.

Writing - review and editing: DV, OB, NV, BB.

**Competing interests:** The authors declare that they have no competing interests.

**Data and materials availability:** All data, code and materials used in the present study are available upon request to the corresponding author.
